# Supplementary material
Source: publisher figshare collection journal article supplement (https://diabetesjournals.figshare.com/ndownloader/files/35946272)
Supplement: Supplementary file 1 [file 35946272]

# Appendix 1: Persistence of undiagnosed diabetes based on HbA1c or FPG, NHANES 1988-1994

Following an initial physical examination, a nonrandom subsample of participants (n=2596, 1392 female 1204 males) in the NHANES 1988-1994 were selected for a second comprehensive examination using the following criteria: (1) mainly adults (2) roughly half aged 20-39 and half aged 40+; (3) roughly half male and half female. This second examination was conducted approximately two weeks after the first and included the collection of fasting plasma glucose (FPG) and glycated hemoglobin (HbA1c) using the same standardized protocol.

Among participants that attended both examinations, we excluded participants who were pregnant, aged <20 years, had diagnosed diabetes, and those who did not have HbA1c and FPG measures from both examinations available. These exclusions resulted in an analytic sample of 679 participants.

For these participants, we calculated the proportion with an elevated HbA1c ( $\geq 6.5\%$ ) or elevated FPG ( $\geq 126$  mg/dl) during the first examination who also had an elevated HbA1c or FPG during the second examination (29/40, 73%). This percentage represents the “persistence” of an elevated test result; it suggests that approximately 73% of participants with an elevated test would have a second elevated measure if they were re-tested, as is currently recommended in clinical guidelines.

|                                                                         |                                                                          | Second exam                                          |                                                                          |       |
|-------------------------------------------------------------------------|--------------------------------------------------------------------------|------------------------------------------------------|--------------------------------------------------------------------------|-------|
|                                                                         |                                                                          | <b>No diabetes:</b><br>FPG<126 mg/dl and<br>A1c<6.5% | <b>Suspected diabetes:</b><br>A1c $\geq$ 6.5% or<br>FPG $\geq$ 126 mg/dl | Total |
| First<br>exam                                                           | <b>No diabetes:</b><br>FPG<126 mg/dl and<br>A1c<6.5%                     | 631<br>(no diabetes)                                 | 8<br>(non-persistent)                                                    | 639   |
|                                                                         | <b>Suspected diabetes:</b><br>A1c $\geq$ 6.5% or<br>FPG $\geq$ 126 mg/dl | 11<br>(non-persistent)                               | 29<br>(persistent diabetes)                                              | 40    |
| <b>29/40 = 73% (95% CI: 56-85%) persistence for elevated FPG or A1c</b> |                                                                          |                                                      |                                                                          |       |

Because repeat HbA1c and FPG testing was only performed this subsample of participants, we could not directly compute the “persistence” of elevated HbA1c or FPG in the entire NHANES cohort. Thus, we assumed this persistence rate approximated the persistence of elevated HbA1c or FPG in the study sample. In the main analysis, we calculated the prevalence of persistent undiagnosed diabetes by determining the proportion of adults with no diagnosed diabetes and elevated HbA1c or FPG in the main NHANES sample and multiplied these estimates by the persistence rate (0.73).

Appendix 2: Age-standardized prevalence of confirmed and persistent undiagnosed diabetes, 2011-2020, by subgroups

|                             | Confirmed undiagnosed diabetes* |        |                                                       |        | Persistent undiagnosed diabetes† |        |                                                       |        |
|-----------------------------|---------------------------------|--------|-------------------------------------------------------|--------|----------------------------------|--------|-------------------------------------------------------|--------|
|                             | Prevalence (SE)                 |        | Proportion (SE) of diabetes cases that is undiagnosed |        | Prevalence (SE)                  |        | Proportion (SE) of diabetes cases that is undiagnosed |        |
|                             | 2011-2020                       | P-val  | 2011-2020                                             | P-val  | 2011-2020                        | P-val  | 2011-2020                                             | P-val  |
| Age group                   |                                 | 0.001  |                                                       | <0.001 |                                  | <0.001 |                                                       | <0.001 |
| 20-44 y                     | 0.76<br>(0.11)                  |        | 20.7<br>(2.6)                                         |        | 1.12<br>(0.14)                   |        | 27.8<br>(3.2)                                         |        |
| 45-64 y                     | 1.67<br>(0.24)                  |        | 11.0<br>(1.5)                                         |        | 2.94<br>(0.27)                   |        | 17.8<br>(1.7)                                         |        |
| 65+ y                       | 1.72<br>(0.38)                  |        | 7.2 (1.5)                                             |        | 3.39<br>(0.38)                   |        | 13.2<br>(1.4)                                         |        |
| Sex                         |                                 | 0.676  |                                                       | 0.755  |                                  | 0.697  |                                                       | 0.764  |
| Female                      | 1.33<br>(0.17)                  |        | 14.7<br>(1.9)                                         |        | 2.13<br>(0.19)                   |        | 18.3<br>(1.6)                                         |        |
| Male                        | 1.24<br>(0.23)                  |        | 14.5<br>(2.4)                                         |        | 2.34<br>(0.24)                   |        | 16.2<br>(1.5)                                         |        |
| Race/ethnicity              |                                 | <0.001 |                                                       | <0.001 |                                  | <0.001 |                                                       | 0.003  |
| Non-Hispanic White          | 0.86<br>(0.16)                  |        | 8.5 (1.7)                                             |        | 1.69<br>(0.18)                   |        | 15.7<br>(1.6)                                         |        |
| Non-Hispanic Black          | 1.53<br>(0.31)                  |        | 14.4<br>(2.8)                                         |        | 2.92<br>(0.35)                   |        | 16.0<br>(1.7)                                         |        |
| Mexican American            | 3.31<br>(0.50)                  |        | 19.5<br>(3.0)                                         |        | 4.08<br>(0.48)                   |        | 19.4<br>(2.0)                                         |        |
| Asian American              | 2.59<br>(0.56)                  |        | 29.3<br>(5.5)                                         |        | 4.03<br>(0.58)                   |        | 24.6<br>(3.0)                                         |        |
| BMI category                |                                 | <0.001 |                                                       | <0.001 |                                  | <0.001 |                                                       | 0.036  |
| <25.0 kg/m <sup>2</sup>     | 0.53<br>(0.16)                  |        | 8.2 (2.7)                                             |        | 1.04<br>(0.19)                   |        | 17.6<br>(3.2)                                         |        |
| 25.0-29.9 kg/m <sup>2</sup> | 0.44<br>(0.08)                  |        | 9.0 (2.8)                                             |        | 1.21<br>(0.16)                   |        | 12.2<br>(1.6)                                         |        |
| ≥30 kg/m <sup>2</sup>       | 2.56<br>(0.31)                  |        | 16.7<br>(1.7)                                         |        | 3.96<br>(0.32)                   |        | 19.8<br>(1.5)                                         |        |
| Education                   |                                 | <0.001 |                                                       | 0.502  |                                  | <0.001 |                                                       | 0.721  |
| College or more             | 0.54<br>(0.13)                  |        | 12.4<br>(2.8)                                         |        | 1.50<br>(0.24)                   |        | 16.5<br>(2.6)                                         |        |
| Some college                | 1.57<br>(0.31)                  |        | 15.4<br>(2.6)                                         |        | 2.05<br>(0.26)                   |        | 15.7<br>(1.9)                                         |        |
| High school or less         | 1.68<br>(0.22)                  |        | 14.9<br>(2.1)                                         |        | 2.98<br>(0.25)                   |        | 18.6<br>(1.4)                                         |        |
| Income-poverty ratio        |                                 | 0.013  |                                                       | 0.009  |                                  | 0.002  |                                                       | 0.056  |
| ≥350%                       | 0.77<br>(0.17)                  |        | 8.3 (1.9)                                             |        | 1.57<br>(0.22)                   |        | 15.3<br>(2.2)                                         |        |
| 130%-349%                   | 1.46<br>(0.21)                  |        | 17.9<br>(2.4)                                         |        | 2.29<br>(0.25)                   |        | 16.7<br>(1.7)                                         |        |

|                           |                |        |               |        |                |       |               |        |
|---------------------------|----------------|--------|---------------|--------|----------------|-------|---------------|--------|
| <130%                     | 1.99<br>(0.35) |        | 16.3<br>(2.4) |        | 3.61<br>(0.37) |       | 19.8<br>(1.9) |        |
| Health insurance coverage |                | 0.013  |               | <0.001 |                | 0.386 |               | <0.001 |
| Yes                       | 1.13<br>(0.14) |        | 11.7<br>(1.4) |        | 2.09<br>(0.15) |       | 16.1<br>(1.1) |        |
| No                        | 2.09<br>(0.44) |        | 24.1<br>(3.2) |        | 3.86<br>(1.00) |       | 28.8<br>(6.2) |        |
| Last health care visit    |                | <0.001 |               | <0.001 |                | 0.329 |               | <0.001 |
| ≤1 y ago                  | 1.01<br>(0.11) |        | 10.6<br>(1.2) |        | 2.09<br>(0.13) |       | 15.3<br>(1.0) |        |
| >1 y ago                  | 3.95<br>(1.03) |        | 57.6<br>(5.6) |        | 3.99<br>(0.82) |       | 61.3<br>(6.6) |        |
| Usual source of care      |                | 0.353  |               | <0.001 |                | 0.454 |               | <0.001 |
| Yes                       | 1.19<br>(0.15) |        | 12.1<br>(1.5) |        | 2.17<br>(0.16) |       | 16.1<br>(1.1) |        |
| No                        | 2.02<br>(0.41) |        | 33.4<br>(5.6) |        | 2.49<br>(0.37) |       | 31.3<br>(5.6) |        |

Note: All estimates are age standardized with 2017-2020 age distribution as reference.

\*Confirmed undiagnosed diabetes was defined as having no diagnosed diabetes and an elevated HbA1c ( $\geq 6.5\%$ ) and FPG ( $\geq 126$  mg/dl).

† Persistent undiagnosed diabetes was defined as having no diagnosed diabetes and an elevated HbA1c ( $\geq 6.5\%$ ) or FPG ( $\geq 126$  mg/dl) after adjusting for within-person variability in HbA1c and FPG measurement.

Appendix 3: Trends in the prevalence of undiagnosed, diagnosed, and total diabetes among US adults, 1988-2020

|                                                              | 1988-<br>1994  | 1999-<br>2000  | 2001-<br>2002   | 2003-<br>2004   | 2005-<br>2006   | 2007-<br>2008   | 2009-<br>2010   | 2011-<br>2012   | 2013-<br>2014   | 2015-<br>2016   | 2017-<br>2020   | P-trend <sup>†</sup> |
|--------------------------------------------------------------|----------------|----------------|-----------------|-----------------|-----------------|-----------------|-----------------|-----------------|-----------------|-----------------|-----------------|----------------------|
| <b>Total diabetes (diagnosed plus undiagnosed diabetes)*</b> | 7.63<br>(0.50) | 8.36<br>(0.99) | 10.13<br>(0.82) | 10.31<br>(0.88) | 10.86<br>(1.08) | 11.65<br>(0.78) | 11.55<br>(0.96) | 12.05<br>(1.26) | 12.74<br>(0.79) | 14.10<br>(0.93) | 15.13<br>(0.93) | <0.001               |
| Diagnosed diabetes                                           | 4.57<br>(0.43) | 5.63<br>(0.82) | 6.58<br>(0.67)  | 7.21<br>(0.78)  | 7.88<br>(0.71)  | 8.57<br>(0.67)  | 8.48<br>(0.79)  | 9.20<br>(1.10)  | 9.99<br>(0.84)  | 11.05<br>(0.87) | 11.67<br>(0.81) | <0.001               |
| Undiagnosed diabetes                                         | 3.05<br>(0.26) | 2.73<br>(0.52) | 3.55<br>(0.37)  | 3.10<br>(0.42)  | 2.98<br>(0.62)  | 3.08<br>(0.30)  | 3.07<br>(0.41)  | 2.84<br>(0.43)  | 2.74<br>(0.35)  | 3.05<br>(0.32)  | 3.46<br>(0.35)  | 0.84                 |
| Proportion of total diabetes that is undiagnosed             | 40.0<br>(3.0)  | 32.7<br>(5.2)  | 35.0<br>(3.1)   | 30.1<br>(3.7)   | 27.4<br>(4.0)   | 26.4<br>(2.3)   | 26.6<br>(2.9)   | 23.6<br>(3.1)   | 21.5<br>(3.0)   | 21.6<br>(2.2)   | 22.9<br>(2.0)   | <0.001               |

Note: Data are presented as prevalence estimates (with standard errors) unless noted.

\* Undiagnosed diabetes was defined as having no diagnosed diabetes and an elevated HbA1c ( $\geq 6.5\%$ ) or FPG ( $\geq 126$  mg/dl)

<sup>†</sup> Based on logistic regression with the midpoint of each period modeled as a linear predictor.

Appendix 4: Trends in the prevalence of undiagnosed diabetes<sup>\*</sup>, 1988-2020, by subgroup

|                             | Prevalence (SE) |             | P-trend <sup>†</sup> | Proportion (SE) of diabetes cases that is undiagnosed |            | P-trend <sup>†</sup> |
|-----------------------------|-----------------|-------------|----------------------|-------------------------------------------------------|------------|----------------------|
|                             | 1988-2010       | 2011-2020   |                      | 1988-2010                                             | 2011-2020  |                      |
| Age group                   |                 |             |                      |                                                       |            |                      |
| 20-44 y                     | 1.10 (0.16)     | 1.53 (0.18) | 0.07                 | 31.8 (3.9)                                            | 34.4 (3.4) | 0.72                 |
| 45-64 y                     | 3.94 (0.34)     | 4.02 (0.37) | 0.38                 | 28.9 (1.9)                                            | 22.9 (2.0) | <0.001               |
| 65+ y                       | 7.28 (0.55)     | 4.64 (0.51) | 0.01                 | 31.3 (1.9)                                            | 17.3 (1.8) | <0.001               |
| Sex                         |                 |             |                      |                                                       |            |                      |
| Female                      | 2.51 (0.20)     | 2.91 (0.25) | 0.27                 | 27.2 (2.6)                                            | 25.9 (2.3) | 0.07                 |
| Male                        | 4.41 (0.28)     | 3.20 (0.32) | 0.02                 | 33.8 (2.4)                                            | 27.9 (2.8) | <0.001               |
| Race/ethnicity              |                 |             |                      |                                                       |            |                      |
| Non-Hispanic White          | 3.07 (0.21)     | 2.31 (0.24) | 0.02                 | 29.9 (3.2)                                            | 22.9 (3.0) | <0.001               |
| Non-Hispanic Black          | 4.99 (0.37)     | 4.00 (0.48) | 0.32                 | 30.2 (2.6)                                            | 25.5 (3.0) | 0.01                 |
| Mexican American            | 4.53 (0.38)     | 5.59 (0.65) | 0.03                 | 33.9 (2.6)                                            | 27.8 (2.8) | 0.26                 |
| Asian American              | -               | 5.52 (0.79) | -                    | -                                                     | 42.3 (4.7) | -                    |
| BMI category                |                 |             |                      |                                                       |            |                      |
| <25.0 kg/m <sup>2</sup>     | 1.53 (0.19)     | 1.42 (0.26) | 0.85                 | 31.8 (5.9)                                            | 28.2 (4.7) | 0.28                 |
| 25.0-29.9 kg/m <sup>2</sup> | 2.87 (0.23)     | 1.65 (0.22) | <0.001               | 31.5 (3.1)                                            | 22.1 (4.0) | <0.001               |
| ≥30 kg/m <sup>2</sup>       | 5.68 (0.37)     | 5.43 (0.42) | 0.28                 | 29.8 (2.1)                                            | 28.2 (2.0) | <0.001               |
| Education                   |                 |             |                      |                                                       |            |                      |
| College or more             | 2.15 (0.31)     | 2.05 (0.33) | 0.79                 | 28.7 (4.9)                                            | 29.6 (3.9) | 0.11                 |
| Some college                | 2.89 (0.32)     | 2.80 (0.35) | 0.63                 | 25.3 (3.1)                                            | 24.3 (2.7) | 0.06                 |
| High school or less         | 4.29 (0.25)     | 4.08 (0.33) | 0.72                 | 34.4 (2.4)                                            | 27.4 (2.6) | <0.001               |
| Income-poverty ratio        |                 |             |                      |                                                       |            |                      |
| ≥350%                       | 2.53 (0.24)     | 2.15 (0.30) | 0.49                 | 32.4 (3.8)                                            | 20.4 (3.4) | <0.001               |
| 130%-349%                   | 3.99 (0.34)     | 3.13 (0.33) | 0.48                 | 30.0 (3.5)                                            | 30.1 (2.7) | <0.001               |
| <130%                       | 3.84 (0.32)     | 4.95 (0.50) | 0.50                 | 28.5 (2.7)                                            | 29.3 (2.6) | 0.25                 |
| Health insurance coverage   |                 |             |                      |                                                       |            |                      |
| Yes                         | 3.20 (0.18)     | 2.86 (0.20) | 0.09                 | 27.2 (1.9)                                            | 24.8 (2.0) | <0.001               |
| No                          | 3.91 (0.54)     | 5.29 (1.36) | 0.17                 | 43.6 (3.7)                                            | 38.0 (4.2) | 0.31                 |
| Last health care visit      |                 |             |                      |                                                       |            |                      |
| ≤1 y ago                    | 3.34 (0.19)     | 2.86 (0.18) | 0.23                 | 26.6 (1.9)                                            | 23.6 (1.6) | <0.001               |
| >1 y ago                    | 3.71 (0.50)     | 5.47 (1.11) | 0.48                 | 68.3 (3.8)                                            | 64.3 (5.0) | 0.02                 |
| Usual source of care        |                 |             |                      |                                                       |            |                      |
| Yes                         | 3.38 (0.19)     | 2.97 (0.21) | 0.16                 | 27.4 (2.1)                                            | 23.6 (1.7) | <0.001               |
| No                          | 3.17 (0.53)     | 3.41 (0.50) | 0.35                 | 61.2 (4.8)                                            | 46.4 (5.5) | <0.001               |

Note: All estimates are age standardized with 2017-2020 age distribution as reference.

<sup>\*</sup> Undiagnosed diabetes was defined as having no diagnosed diabetes and an elevated HbA1c (≥6.5%) or FPG (≥126 mg/dl)

<sup>†</sup> Based on logistic regression with the midpoint of each period modeled as a linear predictor.
